# Supplementary material for: Phage-encoded combinatorial chemical libraries based on bicyclic peptides
Source: Springer Nature journal article supplement (doi:10.1038/nchembio.184), 2009-05-31
Supplement: 41589_2009_BFnchembio184_MOESM5_ESM.mol [file 41589_2009_BFnchembio184_MOESM5_ESM.mol]

  ChemDraw05130914552D

 72 76  0  0  0  0  0  0  0  0999 V2000
   -2.6164   -1.6500    0.0000 C   0  0  0  0  0  0  0  0  0  0  0  0
   -1.9019   -1.2375    0.0000 C   0  0  0  0  0  0  0  0  0  0  0  0
   -1.9019   -0.4125    0.0000 S   0  0  0  0  0  0  0  0  0  0  0  0
   -1.1874   -0.0000    0.0000 S   0  0  0  0  0  0  0  0  0  0  0  0
   -1.1874    0.8250    0.0000 C   0  0  0  0  0  0  0  0  0  0  0  0
   -0.4729    1.2375    0.0000 C   0  0  0  0  0  0  0  0  0  0  0  0
    0.2415    0.8250    0.0000 C   0  0  0  0  0  0  0  0  0  0  0  0
    0.9560    1.2375    0.0000 N   0  0  0  0  0  0  0  0  0  0  0  0
    1.6705    0.8250    0.0000 C   0  0  0  0  0  0  0  0  0  0  0  0
    1.6705   -0.0000    0.0000 C   0  0  0  0  0  0  0  0  0  0  0  0
    2.3849   -0.4125    0.0000 N   0  0  0  0  0  0  0  0  0  0  0  0
    2.3849   -1.2375    0.0000 C   0  0  0  0  0  0  0  0  0  0  0  0
    1.6705   -1.6500    0.0000 C   0  0  0  0  0  0  0  0  0  0  0  0
    1.6705   -2.4750    0.0000 N   0  0  0  0  0  0  0  0  0  0  0  0
    0.9560   -2.8875    0.0000 C   0  0  0  0  0  0  0  0  0  0  0  0
    0.2415   -2.4750    0.0000 C   0  0  0  0  0  0  0  0  0  0  0  0
   -0.4729   -2.8875    0.0000 N   0  0  0  0  0  0  0  0  0  0  0  0
   -1.1874   -2.4750    0.0000 C   0  0  0  0  0  0  0  0  0  0  0  0
   -1.9019   -2.8875    0.0000 C   0  0  0  0  0  0  0  0  0  0  0  0
   -2.6164   -2.4750    0.0000 N   0  0  0  0  0  0  0  0  0  0  0  0
   -1.9019   -3.7125    0.0000 O   0  0  0  0  0  0  0  0  0  0  0  0
    0.2415   -1.6500    0.0000 O   0  0  0  0  0  0  0  0  0  0  0  0
   -1.1874   -1.6500    0.0000 C   0  0  0  0  0  0  0  0  0  0  0  0
   -1.9019   -2.0625    0.0000 C   0  0  0  0  0  0  0  0  0  0  0  0
    0.9584   -1.2389    0.0000 O   0  0  0  0  0  0  0  0  0  0  0  0
    0.9584   -0.4111    0.0000 O   0  0  0  0  0  0  0  0  0  0  0  0
    0.2415    0.0028    0.0000 O   0  0  0  0  0  0  0  0  0  0  0  0
   -3.3284   -1.2389    0.0000 C   0  0  0  0  0  0  0  0  0  0  0  0
   -0.4729    2.0597    0.0000 N   0  0  0  0  0  0  0  0  0  0  0  0
    3.0970   -1.6486    0.0000 C   0  0  0  0  0  0  0  0  0  0  0  0
   -0.7763   -0.9379    0.0000 O   0  0  0  0  0  0  0  0  0  0  0  0
    2.3825    1.2361    0.0000 C   0  0  0  0  0  0  0  0  0  0  0  0
    0.9560   -3.7097    0.0000 C   0  0  0  0  0  0  0  0  0  0  0  0
    1.6705   -4.1222    0.0000 C   0  0  0  0  0  0  0  0  0  0  0  0
    1.6705   -4.9445    0.0000 C   0  0  0  0  0  0  0  0  0  0  0  0
    2.3849   -5.3570    0.0000 C   0  0  0  0  0  0  0  0  0  0  0  0
    2.3849   -6.1820    0.0000 N   0  0  0  0  0  0  0  0  0  0  0  0
    3.8115   -1.2361    0.0000 C   0  0  0  0  0  0  0  0  0  0  0  0
    4.5652   -1.5717    0.0000 C   0  0  0  0  0  0  0  0  0  0  0  0
    5.1172   -0.9586    0.0000 C   0  0  0  0  0  0  0  0  0  0  0  0
    4.7047   -0.2441    0.0000 N   0  0  0  0  0  0  0  0  0  0  0  0
    3.8977   -0.4156    0.0000 C   0  0  0  0  0  0  0  0  0  0  0  0
    4.8201   -2.3563    0.0000 C   0  0  0  0  0  0  0  0  0  0  0  0
    5.6271   -2.5278    0.0000 C   0  0  0  0  0  0  0  0  0  0  0  0
    6.1791   -1.9147    0.0000 C   0  0  0  0  0  0  0  0  0  0  0  0
    5.9242   -1.1301    0.0000 C   0  0  0  0  0  0  0  0  0  0  0  0
    2.3825    2.0611    0.0000 C   0  0  0  0  0  0  0  0  0  0  0  0
   -1.1874    2.4722    0.0000 C   0  0  0  0  0  0  0  0  0  0  0  0
   -1.1874    3.2945    0.0000 C   0  0  0  0  0  0  0  0  0  0  0  0
   -1.8995    2.0611    0.0000 O   0  0  0  0  0  0  0  0  0  0  0  0
   -1.9019    3.7070    0.0000 C   0  0  0  0  0  0  0  0  0  0  0  0
   -1.9019    4.5320    0.0000 C   0  0  0  0  0  0  0  0  0  0  0  0
   -1.1874    4.9445    0.0000 C   0  0  0  0  0  0  0  0  0  0  0  0
   -1.1874    5.7695    0.0000 C   0  0  0  0  0  0  0  0  0  0  0  0
   -1.9019    6.1820    0.0000 C   0  0  0  0  0  0  0  0  0  0  0  0
   -2.6164    5.7695    0.0000 C   0  0  0  0  0  0  0  0  0  0  0  0
   -2.6164    4.9445    0.0000 C   0  0  0  0  0  0  0  0  0  0  0  0
    3.0970    2.4736    0.0000 C   0  0  0  0  0  0  0  0  0  0  0  0
    3.0970    3.2986    0.0000 C   0  0  0  0  0  0  0  0  0  0  0  0
    2.3825    3.7111    0.0000 C   0  0  0  0  0  0  0  0  0  0  0  0
    1.6681    3.2986    0.0000 C   0  0  0  0  0  0  0  0  0  0  0  0
    1.6681    2.4736    0.0000 C   0  0  0  0  0  0  0  0  0  0  0  0
   -4.0405   -1.6500    0.0000 N   0  0  0  0  0  0  0  0  0  0  0  0
   -3.3284   -0.4167    0.0000 O   0  0  0  0  0  0  0  0  0  0  0  0
   -4.7550   -1.2375    0.0000 C   0  0  0  0  0  0  0  0  0  0  0  0
   -5.4670   -1.6486    0.0000 C   0  0  0  0  0  0  0  0  0  0  0  0
   -4.7550   -0.4153    0.0000 C   0  0  0  0  0  0  0  0  0  0  0  0
   -5.4670   -0.0042    0.0000 O   0  0  0  0  0  0  0  0  0  0  0  0
   -6.1791   -1.2375    0.0000 O   0  0  0  0  0  0  0  0  0  0  0  0
   -5.4670   -2.4708    0.0000 C   0  0  0  0  0  0  0  0  0  0  0  0
   -0.4753    3.7056    0.0000 N   0  0  0  0  0  0  0  0  0  0  0  0
   -1.1874   -3.3000    0.0000 H   0  0  0  0  0  0  0  0  0  0  0  0
  1  2  1  0      
  2  3  1  0      
  3  4  1  0      
  4  5  1  0      
  5  6  1  0      
  6  7  1  0      
  7  8  1  0      
  8  9  1  0      
  9 10  1  0      
 10 11  1  0      
 11 12  1  0      
 12 13  1  0      
 13 14  1  0      
 14 15  1  0      
 15 16  1  0      
 16 17  1  0      
 17 18  1  0      
 18 19  1  0      
 19 20  1  0      
  1 20  1  0      
 19 21  2  0      
 16 22  2  0      
 18 23  1  0      
 23 24  1  0      
 13 25  2  0      
 10 26  2  0      
  7 27  2  0      
  1 28  1  6      
  6 29  1  6      
 12 30  1  6      
 23 31  1  1      
  9 32  1  1      
 15 33  1  1      
 33 34  1  0      
 34 35  1  0      
 35 36  1  0      
 36 37  1  0      
 30 38  1  0      
 38 39  1  0      
 39 40  1  0      
 40 41  1  0      
 41 42  1  0      
 42 38  2  0      
 39 43  2  0      
 43 44  1  0      
 44 45  2  0      
 45 46  1  0      
 46 40  2  0      
 32 47  1  0      
 29 48  1  0      
 48 49  1  0      
 48 50  2  0      
 49 51  1  0      
 51 52  1  0      
 52 53  2  0      
 53 54  1  0      
 54 55  2  0      
 55 56  1  0      
 56 57  2  0      
 57 52  1  0      
 47 58  2  0      
 58 59  1  0      
 59 60  2  0      
 60 61  1  0      
 61 62  2  0      
 62 47  1  0      
 28 63  1  0      
 28 64  2  0      
 65 63  1  1      
 65 66  1  0      
 65 67  1  0      
 67 68  1  0      
 66 69  1  1      
 66 70  1  0      
 49 71  1  1      
 18 72  1  1      
M  END
