# Supplementary material for: Phage-encoded combinatorial chemical libraries based on bicyclic peptides
Source: Springer Nature journal article supplement (doi:10.1038/nchembio.184), 2009-05-31
Supplement: 41589_2009_BFnchembio184_MOESM9_ESM.mol [file 41589_2009_BFnchembio184_MOESM9_ESM.mol]

  ChemDraw05130914552D

115118  0  0  0  0  0  0  0  0999 V2000
   -8.6806    1.4829    0.0000 C   0  0  0  0  0  0  0  0  0  0  0  0
   -7.9661    1.0704    0.0000 C   0  0  0  0  0  0  0  0  0  0  0  0
   -7.2516    1.4829    0.0000 C   0  0  0  0  0  0  0  0  0  0  0  0
   -6.5372    1.0704    0.0000 N   0  0  0  0  0  0  0  0  0  0  0  0
   -5.8227    1.4829    0.0000 C   0  0  0  0  0  0  0  0  0  0  0  0
   -5.1082    1.0704    0.0000 C   0  0  0  0  0  0  0  0  0  0  0  0
   -4.3938    1.4829    0.0000 N   0  0  0  0  0  0  0  0  0  0  0  0
   -3.6793    1.0704    0.0000 C   0  0  0  0  0  0  0  0  0  0  0  0
   -2.9648    1.4829    0.0000 C   0  0  0  0  0  0  0  0  0  0  0  0
   -2.2503    1.0704    0.0000 N   0  0  0  0  0  0  0  0  0  0  0  0
   -1.5359    1.4829    0.0000 C   0  0  0  0  0  0  0  0  0  0  0  0
   -0.8214    1.0704    0.0000 C   0  0  0  0  0  0  0  0  0  0  0  0
   -0.1069    1.4829    0.0000 N   0  0  0  0  0  0  0  0  0  0  0  0
    0.6075    1.0704    0.0000 C   0  0  0  0  0  0  0  0  0  0  0  0
    1.3220    1.4829    0.0000 C   0  0  0  0  0  0  0  0  0  0  0  0
    0.6075    0.2482    0.0000 C   0  0  0  0  0  0  0  0  0  0  0  0
    1.3220    2.3051    0.0000 N   0  0  0  0  0  0  0  0  0  0  0  0
    2.0341    1.0718    0.0000 O   0  0  0  0  0  0  0  0  0  0  0  0
    2.0365    2.7176    0.0000 C   0  0  0  0  0  0  0  0  0  0  0  0
    2.7510    2.3051    0.0000 C   0  0  0  0  0  0  0  0  0  0  0  0
    2.7510    1.4829    0.0000 O   0  0  0  0  0  0  0  0  0  0  0  0
    3.4654    2.7176    0.0000 N   0  0  0  0  0  0  0  0  0  0  0  0
    4.2687    2.3137    0.0000 C   0  0  0  0  0  0  0  0  0  0  0  0
    1.3220   -0.1643    0.0000 O   0  0  0  0  0  0  0  0  0  0  0  0
   -0.1045   -0.1629    0.0000 C   0  0  0  0  0  0  0  0  0  0  0  0
    1.3220   -0.9893    0.0000 C   0  0  0  0  0  0  0  0  0  0  0  0
    0.6100   -1.4004    0.0000 O   0  0  0  0  0  0  0  0  0  0  0  0
    2.0341   -1.4004    0.0000 C   0  0  0  0  0  0  0  0  0  0  0  0
    2.7486   -0.9879    0.0000 N   0  0  0  0  0  0  0  0  0  0  0  0
    3.4630   -1.4004    0.0000 C   0  0  0  0  0  0  0  0  0  0  0  0
    3.8755   -2.1149    0.0000 C   0  0  0  0  0  0  0  0  0  0  0  0
    4.7005   -2.1149    0.0000 N   0  0  0  0  0  0  0  0  0  0  0  0
    5.1130   -1.4004    0.0000 C   0  0  0  0  0  0  0  0  0  0  0  0
    5.8275   -0.9879    0.0000 C   0  0  0  0  0  0  0  0  0  0  0  0
    6.5420   -1.4004    0.0000 N   0  0  0  0  0  0  0  0  0  0  0  0
    7.2564   -0.9879    0.0000 C   0  0  0  0  0  0  0  0  0  0  0  0
    7.2564   -0.1657    0.0000 O   0  0  0  0  0  0  0  0  0  0  0  0
    7.9685   -1.3990    0.0000 C   0  0  0  0  0  0  0  0  0  0  0  0
    8.6830   -0.9865    0.0000 N   0  0  0  0  0  0  0  0  0  0  0  0
    8.6830   -0.1615    0.0000 C   0  0  0  0  0  0  0  0  0  0  0  0
    9.3975    0.2510    0.0000 C   0  0  0  0  0  0  0  0  0  0  0  0
    9.3975    1.0760    0.0000 N   0  0  0  0  0  0  0  0  0  0  0  0
    8.6830    1.4885    0.0000 C   0  0  0  0  0  0  0  0  0  0  0  0
    7.9709    1.0774    0.0000 O   0  0  0  0  0  0  0  0  0  0  0  0
    8.6830    2.3107    0.0000 C   0  0  0  0  0  0  0  0  0  0  0  0
    7.9685    2.7232    0.0000 N   0  0  0  0  0  0  0  0  0  0  0  0
    7.2564    2.3121    0.0000 C   0  0  0  0  0  0  0  0  0  0  0  0
    7.2564    1.4899    0.0000 O   0  0  0  0  0  0  0  0  0  0  0  0
    6.5420    2.7246    0.0000 C   0  0  0  0  0  0  0  0  0  0  0  0
    5.8275    2.3121    0.0000 N   0  0  0  0  0  0  0  0  0  0  0  0
    5.1130    2.7246    0.0000 C   0  0  0  0  0  0  0  0  0  0  0  0
    4.2634    1.4915    0.0000 C   0  0  0  0  0  0  0  0  0  0  0  0
    6.5420    3.5468    0.0000 C   0  0  0  0  0  0  0  0  0  0  0  0
   10.1095   -0.1601    0.0000 C   0  0  0  0  0  0  0  0  0  0  0  0
    3.4644   -2.8270    0.0000 C   0  0  0  0  0  0  0  0  0  0  0  0
    2.0341   -2.2226    0.0000 C   0  0  0  0  0  0  0  0  0  0  0  0
   -1.5359    2.3051    0.0000 C   0  0  0  0  0  0  0  0  0  0  0  0
   -5.8227    2.3051    0.0000 C   0  0  0  0  0  0  0  0  0  0  0  0
   -0.9525    2.8885    0.0000 C   0  0  0  0  0  0  0  0  0  0  0  0
   -0.1583    2.6757    0.0000 O   0  0  0  0  0  0  0  0  0  0  0  0
   -1.1653    3.6827    0.0000 O   0  0  0  0  0  0  0  0  0  0  0  0
    1.3196   -2.6351    0.0000 C   0  0  0  0  0  0  0  0  0  0  0  0
    0.6075   -2.2240    0.0000 O   0  0  0  0  0  0  0  0  0  0  0  0
    1.3196   -3.4574    0.0000 C   0  0  0  0  0  0  0  0  0  0  0  0
    2.6422   -2.8270    0.0000 C   0  0  0  0  0  0  0  0  0  0  0  0
    3.8755   -3.5390    0.0000 C   0  0  0  0  0  0  0  0  0  0  0  0
    4.7005   -3.5390    0.0000 C   0  0  0  0  0  0  0  0  0  0  0  0
    5.1116   -2.8270    0.0000 O   0  0  0  0  0  0  0  0  0  0  0  0
    5.1116   -4.2511    0.0000 O   0  0  0  0  0  0  0  0  0  0  0  0
    4.5316   -0.8190    0.0000 O   0  0  0  0  0  0  0  0  0  0  0  0
    4.0444   -0.8190    0.0000 O   0  0  0  0  0  0  0  0  0  0  0  0
   10.1095   -0.9851    0.0000 C   0  0  0  0  0  0  0  0  0  0  0  0
    9.3975   -1.3963    0.0000 O   0  0  0  0  0  0  0  0  0  0  0  0
   10.8216   -1.3963    0.0000 O   0  0  0  0  0  0  0  0  0  0  0  0
    7.9709    0.2496    0.0000 O   0  0  0  0  0  0  0  0  0  0  0  0
    7.1253    4.1302    0.0000 C   0  0  0  0  0  0  0  0  0  0  0  0
    7.9195    3.9174    0.0000 O   0  0  0  0  0  0  0  0  0  0  0  0
    6.9125    4.9244    0.0000 O   0  0  0  0  0  0  0  0  0  0  0  0
    5.1421    3.5463    0.0000 O   0  0  0  0  0  0  0  0  0  0  0  0
    3.5489    1.0790    0.0000 C   0  0  0  0  0  0  0  0  0  0  0  0
    3.5239    0.4229    0.0000 C   0  0  0  0  0  0  0  0  0  0  0  0
    2.7520    0.0405    0.0000 N   0  0  0  0  0  0  0  0  0  0  0  0
   -2.9648    2.3051    0.0000 O   0  0  0  0  0  0  0  0  0  0  0  0
   -5.1082    0.2482    0.0000 O   0  0  0  0  0  0  0  0  0  0  0  0
   -5.1082    2.7176    0.0000 C   0  0  0  0  0  0  0  0  0  0  0  0
   -7.2516    2.3051    0.0000 O   0  0  0  0  0  0  0  0  0  0  0  0
   -9.3926    1.0718    0.0000 C   0  0  0  0  0  0  0  0  0  0  0  0
  -10.1071    1.4843    0.0000 C   0  0  0  0  0  0  0  0  0  0  0  0
  -10.8216    1.0718    0.0000 C   0  0  0  0  0  0  0  0  0  0  0  0
  -10.8216    0.2468    0.0000 C   0  0  0  0  0  0  0  0  0  0  0  0
  -10.1071   -0.1657    0.0000 C   0  0  0  0  0  0  0  0  0  0  0  0
   -9.3926    0.2468    0.0000 C   0  0  0  0  0  0  0  0  0  0  0  0
   -8.6782   -0.1657    0.0000 C   0  0  0  0  0  0  0  0  0  0  0  0
   -4.3545    2.3821    0.0000 C   0  0  0  0  0  0  0  0  0  0  0  0
   -3.8025    2.9952    0.0000 N   0  0  0  0  0  0  0  0  0  0  0  0
   -4.2150    3.7097    0.0000 C   0  0  0  0  0  0  0  0  0  0  0  0
   -5.0220    3.5381    0.0000 C   0  0  0  0  0  0  0  0  0  0  0  0
   -3.9601    4.4943    0.0000 C   0  0  0  0  0  0  0  0  0  0  0  0
   -4.5121    5.1074    0.0000 C   0  0  0  0  0  0  0  0  0  0  0  0
   -5.3191    4.9358    0.0000 C   0  0  0  0  0  0  0  0  0  0  0  0
   -5.5740    4.1512    0.0000 C   0  0  0  0  0  0  0  0  0  0  0  0
    5.8275   -0.1657    0.0000 C   0  0  0  0  0  0  0  0  0  0  0  0
    9.3950    2.7218    0.0000 C   0  0  0  0  0  0  0  0  0  0  0  0
   -3.6793    0.2454    0.0000 C   0  0  0  0  0  0  0  0  0  0  0  0
   -3.0959   -0.3379    0.0000 C   0  0  0  0  0  0  0  0  0  0  0  0
   -2.3017   -0.1251    0.0000 N   0  0  0  0  0  0  0  0  0  0  0  0
   -3.3087   -1.1322    0.0000 O   0  0  0  0  0  0  0  0  0  0  0  0
   -0.8214    0.2482    0.0000 O   0  0  0  0  0  0  0  0  0  0  0  0
    0.6051   -3.8699    0.0000 C   0  0  0  0  0  0  0  0  0  0  0  0
    0.6051   -4.6949    0.0000 C   0  0  0  0  0  0  0  0  0  0  0  0
    1.3196   -5.1074    0.0000 C   0  0  0  0  0  0  0  0  0  0  0  0
    2.0341   -4.6949    0.0000 C   0  0  0  0  0  0  0  0  0  0  0  0
    2.0341   -3.8699    0.0000 C   0  0  0  0  0  0  0  0  0  0  0  0
   -0.1069   -3.4588    0.0000 N   0  0  0  0  0  0  0  0  0  0  0  0
    6.5420    0.2468    0.0000 O   0  0  0  0  0  0  0  0  0  0  0  0
  1  2  1  0      
  2  3  1  0      
  3  4  1  0      
  4  5  1  0      
  5  6  1  0      
  6  7  1  0      
  7  8  1  0      
  8  9  1  0      
  9 10  1  0      
 10 11  1  0      
 11 12  1  0      
 12 13  1  0      
 13 14  1  0      
 14 15  1  0      
 14 16  1  6      
 15 17  1  0      
 15 18  2  0      
 17 19  1  0      
 19 20  1  0      
 20 21  2  0      
 20 22  1  0      
 22 23  1  0      
 16 24  1  0      
 16 25  1  6      
 24 26  1  0      
 26 27  2  0      
 26 28  1  0      
 28 29  1  0      
 29 30  1  0      
 30 31  1  0      
 31 32  1  0      
 32 33  1  0      
 33 34  1  0      
 34 35  1  0      
 35 36  1  0      
 36 37  2  0      
 36 38  1  0      
 38 39  1  0      
 39 40  1  0      
 40 41  1  0      
 41 42  1  0      
 42 43  1  0      
 43 44  2  0      
 43 45  1  0      
 45 46  1  0      
 46 47  1  0      
 47 48  2  0      
 47 49  1  0      
 49 50  1  0      
 50 51  1  0      
 51 23  1  0      
 23 52  1  6      
 49 53  1  1      
 41 54  1  1      
 31 55  1  1      
 28 56  1  1      
 11 57  1  1      
  5 58  1  1      
 57 59  1  0      
 59 60  1  0      
 59 61  2  0      
 56 62  1  0      
 62 63  2  0      
 62 64  1  0      
 55 65  1  6      
 55 66  1  0      
 66 67  1  0      
 67 68  2  0      
 67 69  1  0      
 33 70  2  0      
 30 71  2  0      
 54 72  1  0      
 72 73  2  0      
 72 74  1  0      
 40 75  2  0      
 53 76  1  0      
 76 77  1  0      
 76 78  2  0      
 51 79  2  0      
 52 80  1  0      
 80 81  1  0      
 81 82  1  0      
  9 83  2  0      
  6 84  2  0      
 58 85  1  0      
  3 86  2  0      
  1 87  1  0      
 87 88  1  0      
 88 89  1  0      
 89 90  1  0      
 90 91  1  0      
 91 92  1  0      
 92 93  1  0      
 85 94  2  0      
 94 95  1  0      
 95 96  1  0      
 96 97  2  0      
 97 85  1  0      
 96 98  1  0      
 98 99  2  0      
 99100  1  0      
100101  2  0      
101 97  1  0      
 34102  1  1      
 45103  1  6      
  8104  1  6      
104105  1  0      
105106  1  0      
105107  2  0      
 12108  2  0      
 64109  2  0      
109110  1  0      
110111  2  0      
111112  1  0      
112113  2  0      
113 64  1  0      
109114  1  0      
102115  1  0      
M  END
